# Supplementary material for: Acid-triggered drug release from micelles based on amphiphilic oligo(ethylene glycol)–doxorubicin alternative copolymers
Source: Royal Society of Chemistry journal article supplement (doi:10.1039/c4tb01231c), 2014-01-01
Supplement: c4tb01231c1.pdf [file c4tb01231c1.pdf]

## Supporting Information for

### Acid-Triggered Drug Release from Micelles Based on Amphiphilic Oligo(ethylene glycol)-Doxorubicin Alternative Copolymer†

Ying Wang,<sup>‡a</sup> Qiaojie Luo,<sup>‡b</sup> Rui Sun,<sup>a</sup> Guangyu Zha,<sup>b</sup> Xiaodong Li,<sup>b</sup> Zhiquan Shen<sup>a</sup> and  
Weipu Zhu<sup>\*a</sup>

<sup>a</sup> MOE Key Laboratory of Macromolecular Synthesis and Functionalization,  
Department of Polymer Science and Engineering, Zhejiang University, Hangzhou  
310027, People's Republic of China

<sup>b</sup> Department of Oral and Maxillofacial Surgery, Affiliated Stomatology Hospital,  
College of Medicine, Zhejiang University, Hangzhou 310006, P. R. China

\* Correspondence to: W. P. Zhu (E-mail: [zhuwp@zju.edu.cn](mailto:zhuwp@zju.edu.cn))

† Electronic Supplementary Information (ESI) available. See  
DOI: 10.1039/b000000x/

‡ These two authors contributed equally to this work.

## Characterization of POEG<sub>22</sub>M, POEGM<sub>22</sub>-CHO and POEGM<sub>22</sub>-DOX

POEG<sub>22</sub>M, POEGM<sub>22</sub>-CHO and POEGM<sub>22</sub>-DOX were all characterized by <sup>1</sup>H NMR spectroscopy, as shown in Fig. S1 with all the relevant signals well labelled.

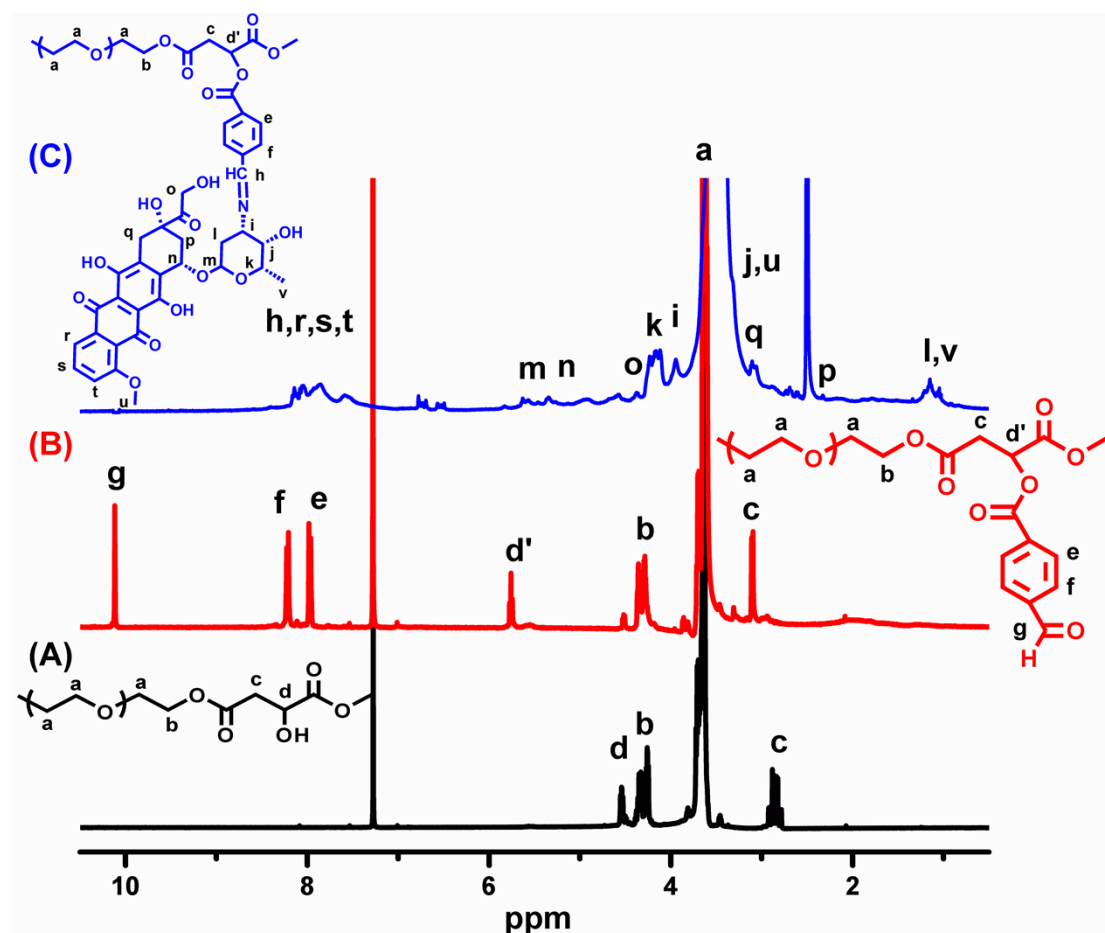

**Fig. S1** <sup>1</sup>H NMR spectra of POEG<sub>22</sub>M (A), POEGM<sub>22</sub>-CHO (B) in CDCl<sub>3</sub>, and POEGM<sub>22</sub>-DOX (C) in DMSO-d<sub>6</sub>.

## Determination of the Calibration Curves of DOX in Phosphate Buffer (PBS, pH 7.4, 5.8, 5.0)

Calibration curves of DOX in PBS (0.01M, pH = 7.4, 5.8) and acetate buffer solution (0.01 M, pH = 5.0) were determined by measuring the absorption of DOX with known concentrations via Shimadzu UV2550 UV-vis spectrophotometer at a wavelength of 479 nm, which is the

typical absorption for DOX. The absorption as a function of DOX concentration was recorded to generate the calibration curve, which is shown in Fig. S2.

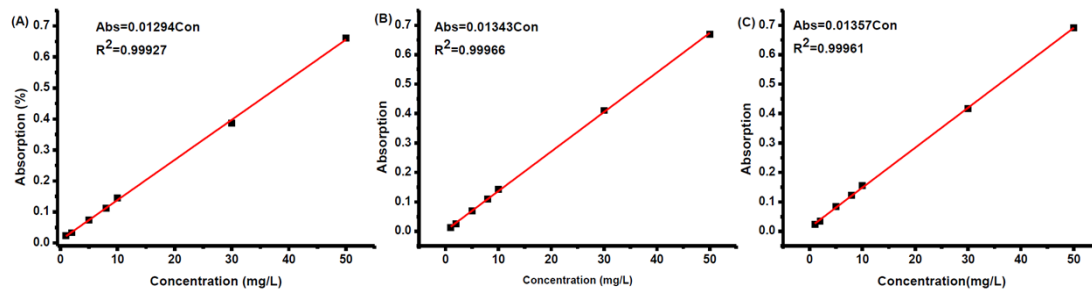

**Fig. S2** Calibration curves of DOX in PBS (0.01 M, pH = 7.4) (A), PBS (0.01 M, pH = 5.8) (B) and acetate buffer solution (0.01 M, pH = 5.0).
